# Supplementary material for: Usefulness of a New Large Set of High Throughput EST-SNP Markers as a Tool for Olive Germplasm Collection Management
Source: Front Plant Sci. 2018 Sep 21;9:1320. doi: 10.3389/fpls.2018.01320 (PMC6160578; doi:10.3389/fpls.2018.01320)
Supplement: Supplementary file 3 [file Table_2.XLSX]

## Sheet: Accessionsincluded
Supplemental Table 2. Cultivated samples included in the present study with their register number in the collection and the main area of cultivation; the number of duplicatedDNA samples, the different trees/accessions, some comments on the reason of inclusion in the sample set and the homonymy cases are also indicated.
Accession names	Register Number	Main area of cultivation	Comments/reasons of inclusion in the study	Nº. Duplicated DNA Samples	Different trees/accessions	Previously known homonymy groups
Abbadi	845	Syria	Previously known redundancies			Abbadi
Abbadi Abou Gabra	1033	Syria	Other cultivars of interest for identification
Abbadi Abou Gabra-842	842	Syria	Core collection 68, 36, 27 (**)
Abbadi Shalal	1034	Syria	Other cultivars of interest for identification
Abou Choki-1126	1126	Syria	Previously known redundancies			Abou
Abou Kanani	840	Syria	Core collection 68, 45, 36, 27, 18 (**)
Abou Satl Mohazam	1043	Syria	Core collection68, 36, 45 (**)
Abunara	1324	Italy	New and not previously identified accessions
Adkam	844	Syria	Previously known redundancies
Adramitini	102	Greece	Previously known redundancies
Aggezi Shami-1	723	Egypt	Core collection 68, 45/previous redundancy (**)
Alameño de Cabra	285	Spain	Other cultivars of interest for identification			Alameño
Alameño de Marchena	254	Spain	Previously known redundancies
Americano	1189	Italy	New and not previously identified accessions
Americano	1243	Italy	New and not previously identified accessions
Arauco	726	Argentina	Previously known redundancies
Arbequina	231	Spain	All core sets(kernel cultivars)**	2
Arbosana	666	Spain	Core collection 68 (**)
Ascolana Tenera	1244	Italy	New and not previously identified accessions
Ascolana Tenera	62	Italy	Other cultivars of interest for identification
Athalassa	852	Cyprus	Previously known redundancies
Augellina	1245	Italy	New and not previously identified accessions
Ayvalik	97	Turkey	Previously known redundancies
Azapa	833	Chile	Other cultivars of interest for identification
Barnea	711	Israel	Core collection 68, 45, 36, 27, 18 (**)
Barri	1026	Syria	Core collection 68, 45, 36, 27 (**)
Beladi o Souri	133	Lebanon	Other cultivars of interest for identification
Bella di Spagna	1246	Italy	New and not previously identified accessions	2
Belluti	690	Turkey	Core collection 68, 45 (**)	2
Beyaz Yaglik	683	Turkey	Previously known redundancies
Bianchera	1247	Italy	New and not previously identified accessions
Biancolilla	1814	Italy	Other cultivars of interest for identification	2
Blanqueta	48	Spain	Core collection 68 (**)
Bolvino	18	Spain	Core collection 27 (**)
Bosana	1170	Italy	Other cultivars of interest for identification	2	2
Calatina	1329	Italy	New and not previously identified accessions
Canetera	653	Spain	Core collection 68, 45, 27 (**)
Caninese	77	Italy	Core collection 68 (**)
Cañivano Blanco	52	Spain	Previously known redundancies			Cañivano
Cañivano Negro	259	Spain	Other cultivars of interest for identification
Carolea	1249	Italy	New and not previously identified accessions
Carolea	736	Italy	Other cultivars of interest for identification
Carrasqueño de Alburquerque	494	Spain	Previously known redundancies			Carrasqueño
Carrasqueño de Elvas	125	Portugal	Other cultivars of interest for identification
Carrasqueño de Porcuna	795	Spain	Core collection 68 (**)	2
Cavalieri	1332	Italy	New and not previously identified accessions
Cerezuela	331	Spain	Other cultivars of interest for identification
Chalkidikis	220	Greece	Other cultivars of interest for identification
Changlot Real	15	Spain	Other cultivars of interest for identification
Chemlal de Kabilye	118	Algeria	Core collection 68, 45, 36, 27 (**)
Chemlali-744	744	Tunisia	Core collection 68/previous redundancy (**)
Chesna	374	Spain	Previously known redundancies
Cima di Melfi	1250	Italy	New and not previously identified accessions
Cipresino	90	Italy	Other cultivars of interest for identification
Confetto	1316	Italy	New and not previously identified accessions
Coratina	1251	Italy	New and not previously identified accessions
Coratina	79	Italy	Other cultivars of interest for identification
Corbella	645	Spain	Different accessions per cultivar
Corbella	659	Spain	Different accessions per cultivar
Corbella- 817	817	Spain	Other cultivars of interest for identification
Cordovil de Castelo Branco	886	Portugal	Previously known redundancies
Corsicana da Olio	1321	Italy	New and not previously identified accessions
Craputea	1252	Italy	New and not previously identified accessions
Crastu	1334	Italy	New and not previously identified accessions
Cuoricino	1194	Italy	New and not previously identified accessions
Doebli	1044	Syria	Core collection 27 (**)	2
Dokkar	539	Turkey	Core collection 68, 45, 36, 27, 18 (**)
Dolce Agogia-1163	1163	Italy	Previously known redundancies		2
Dolce Agogia*	1363	Italy	Different accessions per cultivar
Dolce Agogia*	65	Italy	Different accessions per cultivar
Dulzal	352	Spain	Previously known redundancies
Empeltre	13	Spain	Core collection 68 (**)	2
Erbek Yaglik	681	Turkey	Previously known redundancies
Escarabajuelo de Ubeda	353	Spain	Previously known redundancies
Faresana	1253	Italy	New and not previously identified accessions
Fasolina	1254	Italy	New and not previously identified accessions
Fasolona	1255	Italy	New and not previously identified accessions
Figueretes	822	Spain	Core collection 68 (**)
Filare	1196	Italy	New and not previously identified accessions
Fishomi	1142	Iran	Core collection 68 (**)	2
Forastera de Tortosa	652	Spain	Core collection 45, 36 (**)
Frantoio	80	Italy	All core sets(kernel cultivars)**	2
Frantoio	179	Italy	Different accessions per cultivar
Frantoio	1198	Italy	New and not previously identified accessions
Frantoio	1256	Italy	New and not previously identified accessions
Frantoio A. Corsini	81	Italy	Core collection 68/previous redundancy (**)	2
Gatuno	380	Spain	Previously known redundancies
Gaydoyrelia	695	Greece	Core collection 68 (**)
Gemlik	92	Turkey	Other cultivars of interest for identification
Gerboui	538	Tunisia	Other cultivars of interest for identification
Gordal Sevillana	234	Spain	Previously known redundancies
Grappolo	181	Italy	Core collection 45, 36 (**)	2
Grit Eytini	680	Turkey	Previously known redundancies
Grosal de Albocafer	811	Spain	Previously known redundancies		2	Grosal
Grosal de Cieza	802	Spain	Core collection 68 (**)
Grossa di Spagna	1258	Italy	New and not previously identified accessions
Hamed	722	Egypt	Previously known redundancies
Haouzia	835	Marocco	Previously known redundancies
Hojiblanca	2	Spain	Other cultivars of interest for identification
Istarska Bjelica	735	Croatia	Core collection 68, 45 (**)
Itrana	1259	Italy	New and not previously identified accessions
Itrana	68	Italy	Other cultivars of interest for identification
Jabali	1118	Syria	Core collection 68, 45, 36, 27, 18 (**)
Jabaluna	392	Spain	Other cultivars of interest for identification
Joanenca	667	Spain	Core collection 68 (**)
Kaissy	140	Syria	Previously known redundancies
Kalamon	105	Greece	Core collection 68, 36, 27 (**)
Kato Drys	848	Cyprus	Core collection 68 (**)
Kelb et Ter	145	Syria	Previously known redundancies		2
Kelb et Ter-144	144	Syria	Core collection 68, 45 (**)/previous redundancy	2
Kerkiras	694	Greece	Other cultivars of interest for identification		2
Khalkhali	1107	Syria	Other cultivars of interest for identification
Khashabi	1120	Syria	Core collection 68 (**)
Kiraz	679	Turkey	Core collection 68, 45, 18 (**)
Kiti	850	Cyprus	Previously known redundancies
Klirou	849	Cyprus	Previously known redundancies
Klon-14-1812	1812	Albania	Core collection 36, 27 (**)
Klon 14	1081	Albania	Other cultivars of interest for identification
Kokerrmadh Berati	1080	Albania	Previously known redundancies		2
Koroneiki	218	Greece	All core sets(kernel cultivars)**	2
Larcianese	1205	Italy	New and not previously identified accessions
Leccino	1260	Italy	New and not previously identified accessions
Leccino*	82	Italy	All core sets(kernel cultivars)**	2
Leccio di Corno	83	Italy	Previously known redundancies
Leccio Maremmano	1210	Italy	New and not previously identified accessions
Leccio Maremmano	1261	Italy	New and not previously identified accessions
Lechín de Sevilla	5	Spain	Other cultivars of interest for identification
Lentisca	384	Spain	Core collection 45 (**)
Lloron de Iznalloz	400	Spain	Previously known redundancies
Llumeta	226	Spain	Core collection 68, 45, 36, 27 (**)
Lucques	322	France	Core collection 68, 45 (**)	2
Lumiaro	1337	Italy	New and not previously identified accessions
Maarri	1125	Syria	Core collection 68, 45, 36, 27 (**)
Maelia	856	Israel	Previously known redundancies		2
Mahati	846	Syria	Other cultivars of interest for identification
Maiatica di Ferrandina	1262	Italy	New and not previously identified accessions
Majhol-1013	1013	Syria	Other cultivars of interest for identification			Majhol
Majhol-1117	1117	Syria	Previously known redundancies
Majhol-152	152	Syria	Core collection 68, 45, 36, 27, 18 (**)
Majorca	1317	Italy	New and not previously identified accessions
Manna	1313	Italy	New and not previously identified accessions
Manzanilla Cacereña	430	Spain	Core collection 45 (**)	2		Manzanilla
Manzanilla de Almeria	784	Spain	Core collection 68 (**)
Manzanilla de Ayora	971	Spain	Other cultivars of interest for identification
Manzanilla de Sevilla*	21	Spain	All core sets(kernel cultivars)**	2	2
Manzanilla de Sevilla*	267	Spain	Different accessions per cultivar		2
Manzanilla de Tortosa	22	Spain	Core collection 68/previous redundancy (**)
Manzanilla Valle las Palmeras	1129	Mexico	Previously known redundancies
Manzanillera de Huercal Overa	757	Spain	Core collection 68, 45, 36, 27, 18 (**)
Manzanillo de Santisteban Pto	791	Spain	Other cultivars of interest for identification
Mari	1143	Iran	Core collection 68, 45, 36, 18 (**)
Marsaline	535	Tunisia	Previously known redundancies
Masabi	1121	Syria	Core collection 68 (**)
Mastoidis	345	Greece	Core collection, 68, 45, 36 (**)	2
Maureya	699	Greece	Core collection 68, 45, 36, 27, 18 (**)
Maurino	1214	Italy	New and not previously identified accessions
Maurino	1263	Italy	New and not previously identified accessions
Maurino	84	Italy	Other cultivars of interest for identification
Mawi Stanboli	138	Syria	Previously known redundancies
Megaritiki	108	Greece	Core collection 68, 45, 36, 27 (**)
Meloncillo	513	Spain	Previously known redundancies
Menara	836	Marocco	Previously known redundancies
Menya	669	Spain	Core collection 68, 45, 36, 27, 18 (**)
Mixani	1079	Albania	Core collection 68 (**)
Mollar de Cieza	612	Spain	Other cultivars of interest for identification
Moraiolo	1264	Italy	New and not previously identified accessions
Moraiolo T. Corsini	86	Italy	Previously known redundancies
Moraiolo*	78	Italy	Different accessions per cultivar
Moraiolo*	85	Italy	Different accessions per cultivar
Morchiaio	1265	Italy	New and not previously identified accessions
Morejona	349	Spain	Core collection 68/previous redundancy (**)
Moresca	1340	Italy	New and not previously identified accessions
Morrut	224	Spain	Core collection 36, 45 (**)	2
Myrtolia	700	Greece	Core collection 68, 36 (**)
Nasitana	1341	Italy	New and not previously identified accessions
Negral de Sabiñan	1075	Spain	Previously known redundancies
Negrillo de Estepa	301	Spain	Previously known redundancies
Nera di Gonnos	1314	Italy	New and not previously identified accessions
Nera di Oliena	1308	Italy	New and not previously identified accessions
Nevadillo Blanco de Osuna	351	Spain	Other cultivars of interest for identification
Nevadillo Blanco de Lucena	58	Spain	Previously known redundancies
Nocellara del Belice	1267	Italy	New and not previously identified accessions
Nocellara del Belice	1344	Italy	New and not previously identified accessions
Nocellara Etnea	1266	Italy	New and not previously identified accessions	2
Nocellara Messinese	1268	Italy	New and not previously identified accessions
Oblonga	210	Spain	Previously known redundancies
Ocal-25	25	Spain	Other cultivars of interest for identification
Ocal	427	Spain	Other cultivars of interest for identification
Ocal*	261	Spain	Different accessions per cultivar
Ocal*	327	Spain	Different accessions per cultivar		2
Ocal*	378	Spain	Different accessions per cultivar
Ocal*	525	Spain	Different accessions per cultivar		2
Ocal*	282	Spain	Different accessions per cultivar
Ogliarola del Bradano	1270	Italy	New and not previously identified accessions
Ogliarola del Vulture	1271	Italy	New and not previously identified accessions
Ojua	878	Spain	Previously known redundancies
Olivo di Mandanici	1348	Italy	New and not previously identified accessions
Olivo Macho de Santisteban Pto	338	Spain	Previously known redundancies
Palma	1307	Italy	New and not previously identified accessions
Palomar	661	Spain	Core collection 68 (**)
Passulunara	1349	Italy	New and not previously identified accessions
Pecoso	421	Spain	Previously known redundancies
Pendolino	87	Italy	Core collection 68 (**)		2
Pendolino	1274	Italy	New and not previously identified accessions
Pendolino-1	1161	Italy	Previously known redundancies
Picholine Marrocaine	101	Marocco	Other cultivars of interest for identification			Picholine
Picholine*	1471	France	Different accessions per cultivar		2
Picholine*	70	France	Core collection 68, 45 (**)
Pico Limon	273	Spain	Previously known redundancies
Picual de Estepa	354	Spain	Previously known redundancies			Picual
Picual*	9	Spain	All core sets(kernel cultivars)**	6	5
Picual*	1470	Spain	Different accessions per cultivar
Picual de Hoja Clara	312	Spain	Previously known redundancies
Picual de Hoja Clara	1162	Spain	Previously known redundancies
Picual de Hoja Oscura	313	Spain	Previously known redundancies
Picudo	3	Spain	Core collection 36 (**)	2		Picudo
Picudo de Fruto Rojo	316	Spain	Previously known redundancies
Picudo de Montoro	748	Spain	Previously known redundancies
Pidicuddara	1350	Italy	New and not previously identified accessions
Piñonera	969	Spain	Core collection 68 (**)
Ravece	1276	Italy	New and not previously identified accessions
Razzola	177	Italy	Previously known redundancies
Redondilla de Logroño	16	Spain	Core collection 68, 45 (**)
Rosciola	88	Italy	Other cultivars of interest for identification
Rosino	1235	Italy	New and not previously identified accessions
Rossellino	1236	Italy	New and not previously identified accessions
Rossello	1237	Italy	New and not previously identified accessions
Rotondella	1277	Italy	New and not previously identified accessions
Safrawi	1116	Syria	Other cultivars of interest for identification			Safrawi
Safrawi*	142	Syria	Different accessions per cultivar
Safrawi*	1112	Syria	Different accessions per cultivar
Salicino	1241	Italy	New and not previously identified accessions
San Francesco	1239	Italy	New and not previously identified accessions
Sant'Agostino	1278	Italy	New and not previously identified accessions
Sant'Agostino	71	Italy	Other cultivars of interest for identification
Santa Caterina	1238	Italy	New and not previously identified accessions
Santa Caterina	72	Italy	Previously known redundancies
Santa Martinenga	1280	Italy	New and not previously identified accessions
Selvatico	893	Italy	Previously known redundancies
Semidana	1323	Italy	New and not previously identified accessions
Shami-1041	1041	Syria	Core collection 68 (**)	2		Shami
Shami-141	141	Syria	Previously known redundancies
Shami-953	953	Syria	Previously known redundancies
Shengeh	1141	Iran	Core collection 68,45, 36, 27 (**)	2
Sigoise	119	Algeria	Previously known redundancies
Sivigliana da Mensa	1318	Italy	New and not previously identified accessions
Sivigliana da Olio	1304	Italy	New and not previously identified accessions
Tanche	74	France	Core collection 68/previous redundancy
Tempranillo de Calatayud	57	Spain	Previously known redundancies			Tempranillo
Tempranillo de Lucena	756	Spain	Other cultivars of interest for identification
Tempranillo de Lucena-1	59	Spain	Previously known redundancies
Temprano	358	Spain	Core collection 68, 45, 36 (**)
Terza Grande	1310	Italy	New and not previously identified accessions
Toffahi	721	Egypt	Core collection 68, 45 (**)	2		Toffahi
Toffahi	1000	Syria	Other cultivars of interest for identification
Tonda Iblea	1352	Italy	New and not previously identified accessions
Tondello	1242	Italy	New and not previously identified accessions
Ulliri I Kuq	1078	Albania	Core collection 68, 45 (**)
Uovo di Piccione	1282	Italy	New and not previously identified accessions
Uovo di Piccione	75	Italy	Other cultivars of interest for identification
Uslu	95	Turkey	Core collection 68, 45, 36 (**)
Valanolia	103	Greece	Other cultivars of interest for identification
Varudo	749	Spain	Previously known redundancies
Verdal de Alhama	532	Spain	Previously known redundancies
Verdalon	585	Spain	Previously known redundancies
Verdial de Badajoz*	877	Spain	Core collection 68 (**)			Verdial
Verdial de Badajoz*	988	Spain	Other cultivars of interest for identification		2
Verdial de Montefrío	397	Spain	Previously known redundancies
Verdial de Velez-Malaga	883	Spain	Core collection 68 (**)	2
Verdial de Velez-Malaga-51	51	Spain	Core collections 68, 36, 45 (**)	2
Yun Çelebi	689	Turkey	Previously known redundancies
Zaity*	788	Syria	Different accessions per cultivar
Zaity*	1108	Syria	Different accessions per cultivar
Zaity*	1109	Syria	Different accessions per cultivar
Zarza	38	Spain	Previously known redundancies
Zarzariega de Orcera	356	Spain	Previously known redundancies
* Accessions introduced at different moments in the collection, but sharing the same names and found, in a later stage, to belong to the same cultivars by mean of different molecular markers.
(**) Belaj et al., 2012
